# Supplementary figures and images for: Design Element Preferences in Public Facilities: An Eye Tracking Study
Source: MDPI journal article supplement (doi:10.3390/land12071411), 2023-07-14

## Eye-tracking data

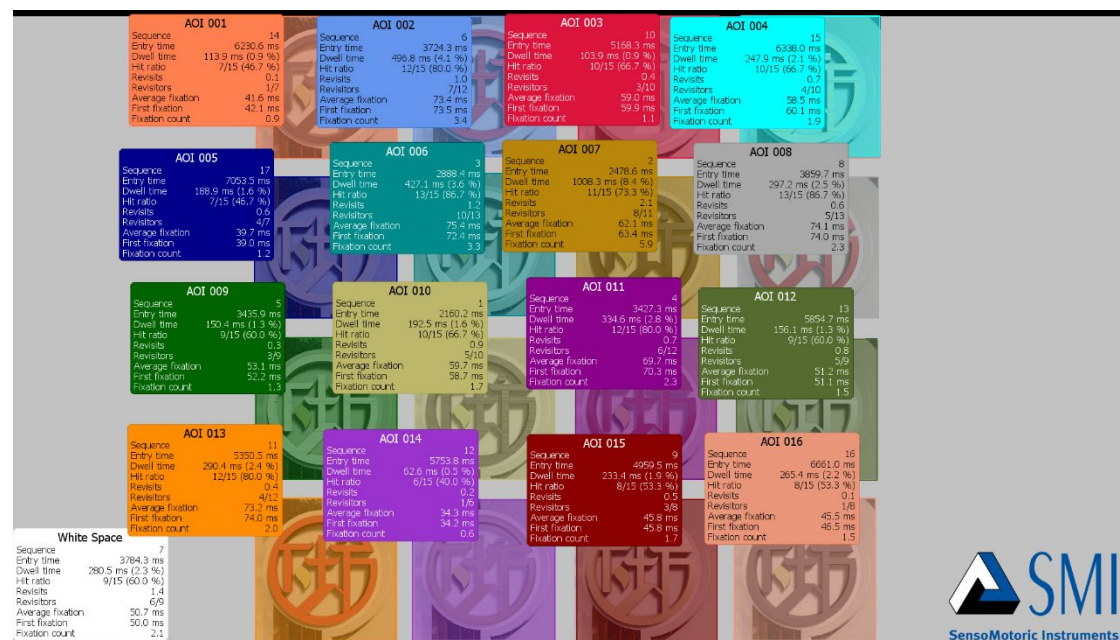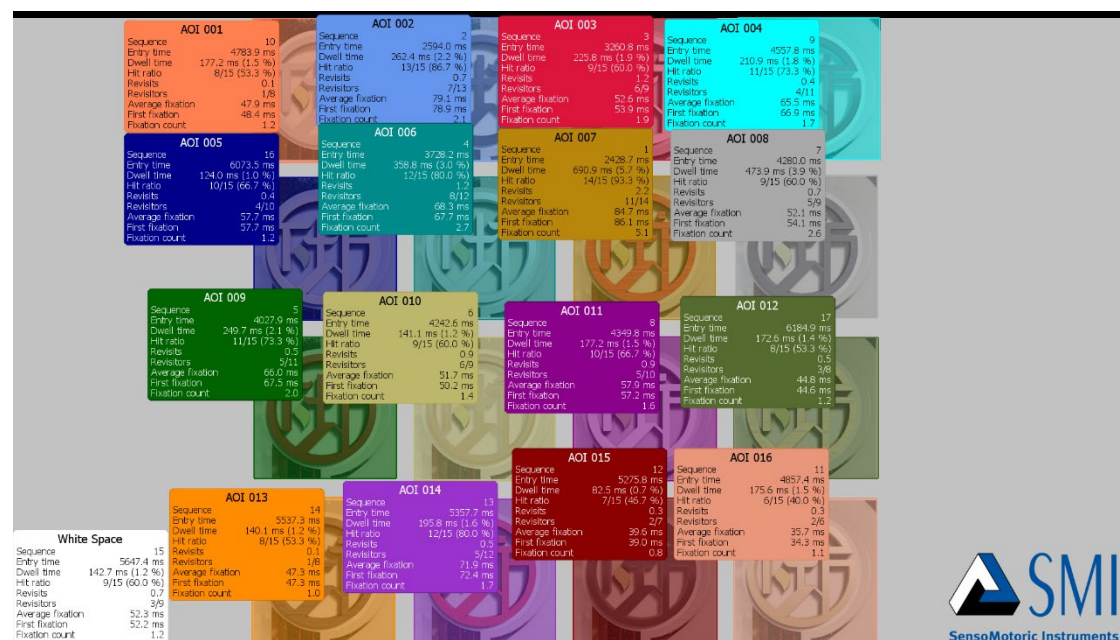

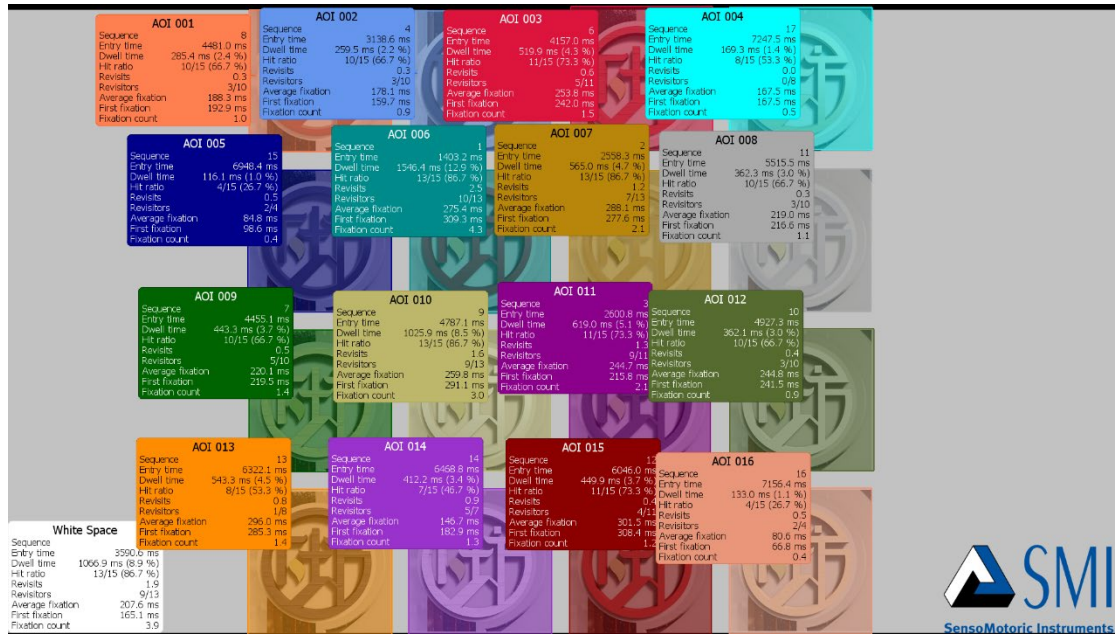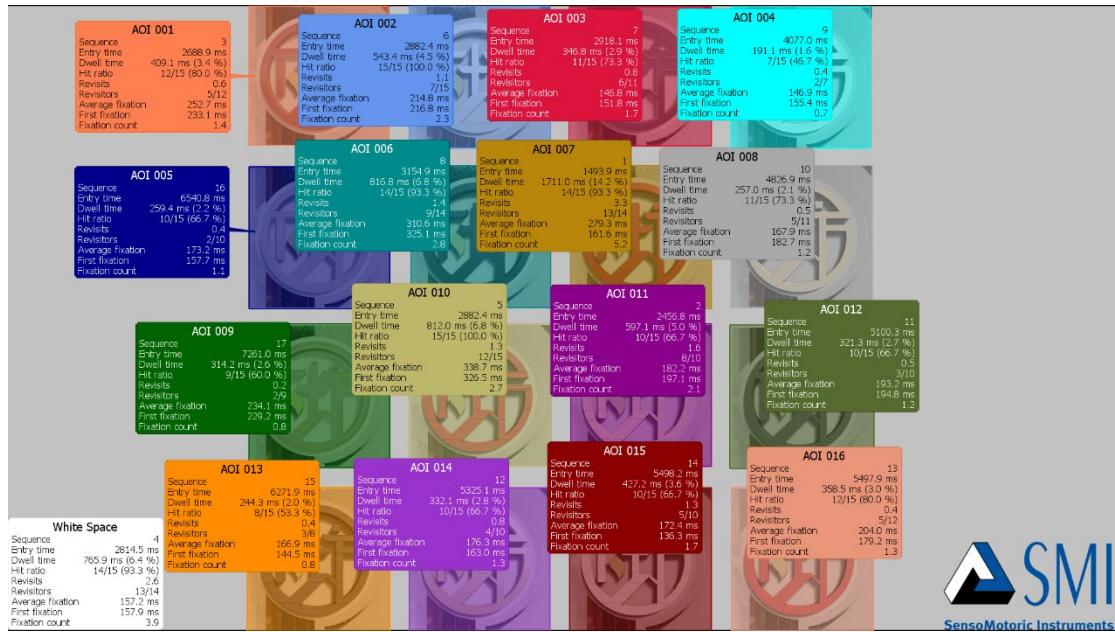

## Questionnaire

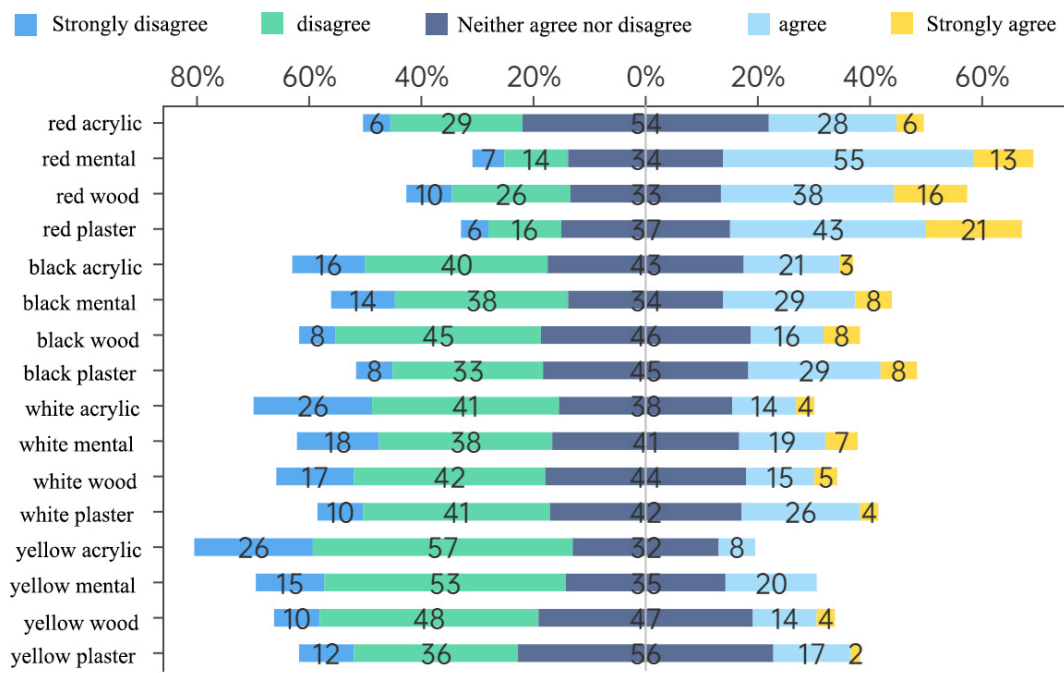

Supplement: s1 [file s1]
